# Supplementary material for: Fortification of blood plasma from cancer patients with human serum albumin decreases the concentration of cisplatin-derived toxic hydrolysis products in vitro
Source: Royal Society of Chemistry journal article supplement (doi:10.1039/c4mt00220b), 2014-01-01
Supplement: c4mt00220b3.pdf [file c4mt00220b3.pdf]

### Supplementary Figure S1

Zn-specific chromatograms obtained for the analysis of plasma from healthy human adults (n=14) and pediatric cancer patients (n=11) spiked with CP (0.04 mg/mL). The mixture was incubated at 37 °C and analyzed after 5 min and 2 hr. Stationary phase: Superdex 200 10/300 GL column (30x1.0 cm I.D., 13 µm particle size) at 22°C. Mobile phase: PBS buffer (pH 7.4). Flow rate: 1.0 mL/min. Injection volume: 500 µL. Detector: ICP-AES at 214.423 nm (Pt). Peaks 1-3: protein bound Pt-species, peaks 4-5: Pt-containing hydrolysis products, peak 6: CP. The retention times of the molecular weight markers are depicted on top.
