# Supplementary figures and images for: Fortification of blood plasma from cancer patients with human serum albumin decreases the concentration of cisplatin-derived toxic hydrolysis products in vitro
Source: Royal Society of Chemistry journal article supplement (doi:10.1039/c4mt00220b), 2014-01-01

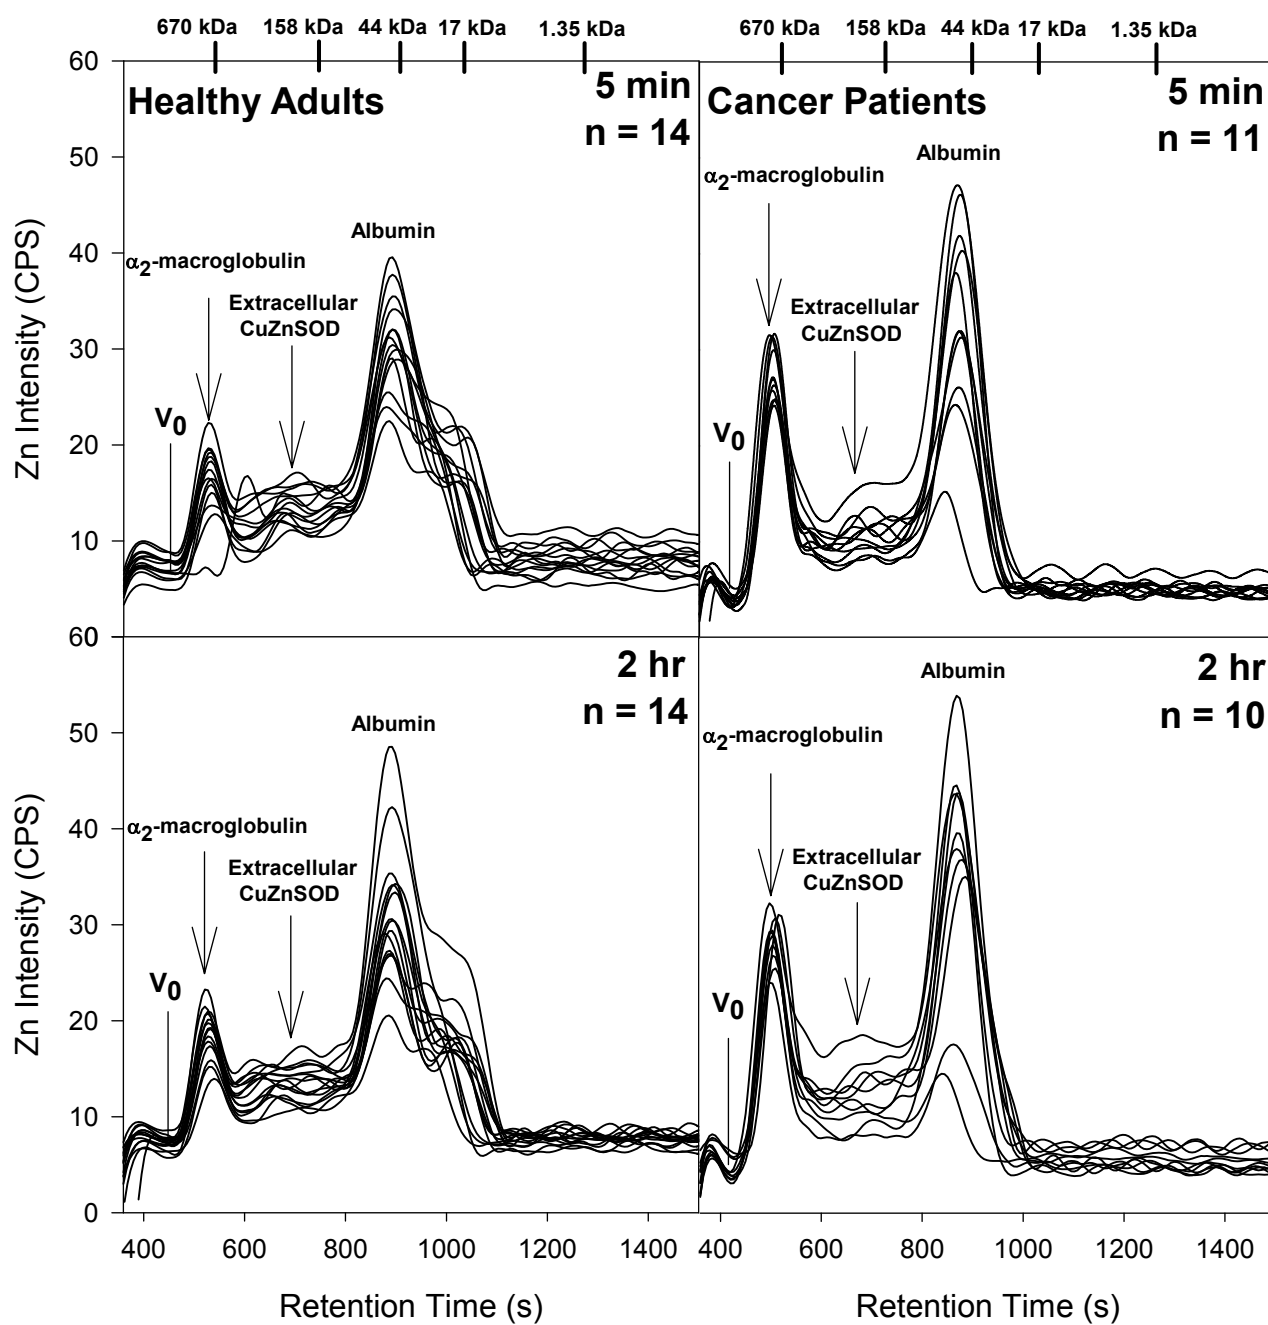

Supplement: c4mt00220b2.pdf [file c4mt00220b2.pdf]
